# Supplementary material for: Early Outcome Data Assessing Utility of a Post-Test Genomic Counseling Framework for the Scalable Delivery of Precision Health
Source: MDPI journal article supplement (doi:10.3390/jpm8030025), 2018-07-25
Supplement: s1 [file s1]

**Supplementary Figure SII: Post-Test Genomic Counseling Semi-Scripted Template**

1. Contract
  - a. Discuss the flow of counseling session initially driven by participants questions on Qualtrics survey
  - b. Discuss the use of risk summary report and visual aids
2. Address disease risk(s) as noted by participant on Qualtrics survey
  - a. Utilize test results summary report
  - b. Discuss and assess medical/family history relative to a particular disease and/or test report
  - c. Use visual aids to illustrate magnitude of risk
  - d. Access web portal to co-view test reports, other educational aids with participant if needed
3. Discuss and assess additional personal medical/family history concerns
4. Psychosocial assessment
5. Develop action plan
6. Inform participant that the risk summary reports and a summary letter will be actively routed to the participant by secure email, and their healthcare provider team through the EMR, to encourage additional review and follow-up
